# Supplementary material for: Shape-controlled synthesis of TiO2hollow structures and their application in lithium batteries
Source: Royal Society of Chemistry journal article supplement (doi:10.1039/c1jm14637h), 2011-12-06
Supplement: c1jm14637h.pdf [file c1jm14637h.pdf]

## **Supplementary Information**

# **Shape-Controlled Synthesis of TiO<sub>2</sub> Hollow Structures and Their Application in Lithium Batteries**

**Yong Wang,\* Xiaowen Su, and Shan Lu**

Department of Chemistry, Capital Normal University, Beijing 100048, P. R. China,  
E-mail: [yongwang@home.ipe.ac.cn](mailto:yongwang@home.ipe.ac.cn).

## S1. XRD patterns of monodisperse Fe<sub>2</sub>O<sub>3</sub> particles with different shapes

Fig. S1 displays the X-ray diffraction (XRD) patterns of the as-obtained samples. In Fig. S1, all the as-obtained samples are identified as the single phase  $\alpha$ -Fe<sub>2</sub>O<sub>3</sub> with well-crystallized rhombohedral structure ( $a=0.5038$  nm,  $c=1.3772$  nm, JCPDS file No. 24-0072). No peaks from other phases are found, suggesting high purity of the final products.

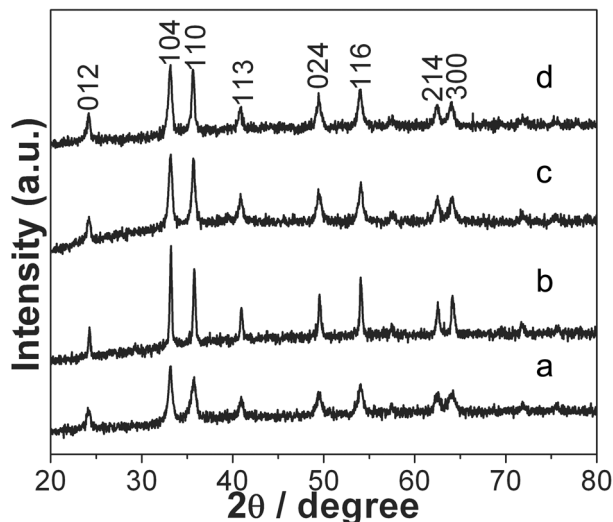

**Fig. S1** XRD patterns of monodisperse Fe<sub>2</sub>O<sub>3</sub> particles with different shapes: (a) peanuts; (b) capsules; (c) ellipsoids; and (d) pseudocubes.

## S2. XRD patterns of monodisperse $\alpha$ -Fe<sub>2</sub>O<sub>3</sub>/TiO<sub>2</sub> core/shell particles with different shapes

The crystallographic structures of the as-formed  $\alpha$ -Fe<sub>2</sub>O<sub>3</sub>/TiO<sub>2</sub> core/shell particles with different shapes in the second step are determined by X-ray diffraction (XRD) analysis. In Fig. S2, all of the peaks observed can be unequivocally assigned to  $\alpha$ -Fe<sub>2</sub>O<sub>3</sub> with rhombohedral structure ( $a=0.5038$  nm,  $c=1.3772$  nm, JCPDS file No. 24-0072, signal #) and anatase TiO<sub>2</sub> with tetragonal structure ( $a=0.37892$  nm,  $c=0.9537$  nm, JCPDS file No. 71-1167, signal +).

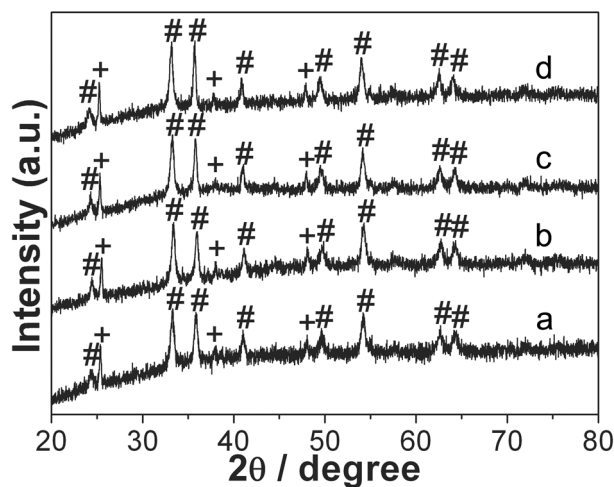

**Fig. S2** XRD patterns of monodisperse  $\alpha$ -Fe<sub>2</sub>O<sub>3</sub>/TiO<sub>2</sub> core/shell with different shapes: (a) peanuts; (b) capsules; (c) ellipsoids; and (d) pseudocubes. Fe<sub>2</sub>O<sub>3</sub> (#) and TiO<sub>2</sub> (+).

### S3. FESEM images and EDX spectra of monodisperse $\alpha$ -Fe<sub>2</sub>O<sub>3</sub>/TiO<sub>2</sub> core/shell particles with different shapes

The morphology and structure of the samples were further investigated by field emission scanning electron microscopy (FESEM, Hitachi, S-4800) with energy-dispersive X-ray (EDX) spectroscopy. The element composition is further confirmed by energy dispersive X-ray (EDX) spectroscopy analysis. EDX point spectra taken from the center point of a core/shell particle and line scans show strong Fe, Ti and O signals (Fig. S3). Au peaks have been observed in EDX analysis because of the gold coating deposited on the samples before FESEM/EDX analysis. Al peaks are attributed to the aluminum foil used as the holder. As shown in Fig. S3j-l, a broken  $\alpha$ -Fe<sub>2</sub>O<sub>3</sub>/TiO<sub>2</sub> core/shell particle with pseudocube-shape can be observed. It is noted that Fe signal strengthens and Ti signal weakens beside the broken part (Fig. S3l), which further confirms the formation of  $\alpha$ -Fe<sub>2</sub>O<sub>3</sub>/TiO<sub>2</sub> core/shell particles.

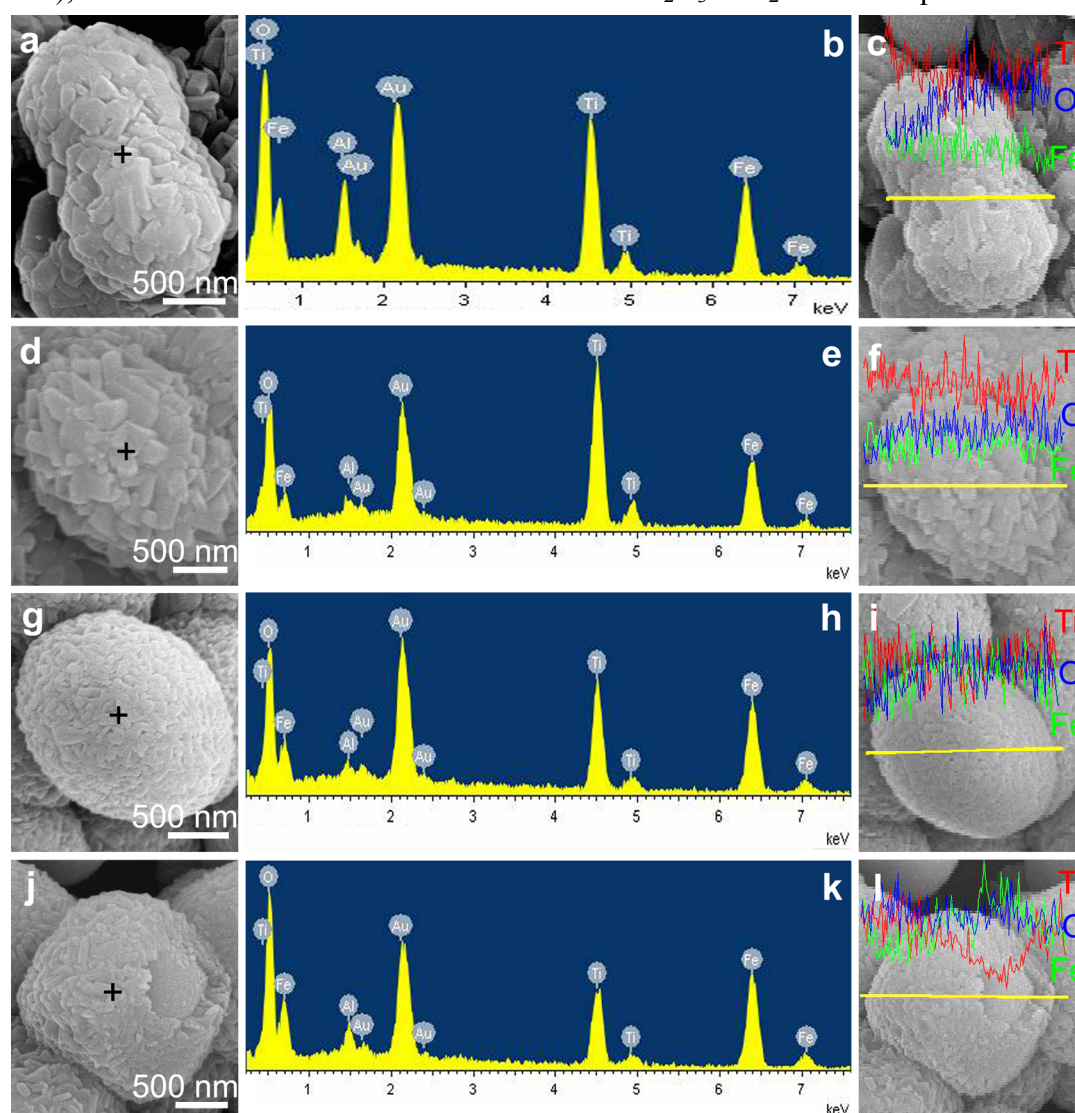

**Fig. S3** FESEM images, EDX point spectra and line scans of monodisperse  $\alpha$ -Fe<sub>2</sub>O<sub>3</sub>/TiO<sub>2</sub> core/shell with different shapes: (a-c) peanuts; (d-f) capsules; (g-i) ellipsoids; and (j-l) pseudocubes. Al peaks are attributed to the aluminum foil used as the holder. The Au peaks are from the conducting layer of Au used for FESEM characterization. (b), (e), (h) and (k) are EDX point spectra taken from the center point of a core/shell particle marked with a cross in the FESEM images of (a), (d), (g) and (j), respectively.

#### S4. EDX spectra of TiO<sub>2</sub> hollow particles with different shapes under TEM

The element composition is further confirmed with energy dispersive X-ray (EDX) spectroscopy analysis under TEM. EDX point spectra, taken from the center point of a hollow particle, show strong Ti and O signals (Fig. S4), and no Fe signal is found, which demonstrates the complete removal of Fe<sub>2</sub>O<sub>3</sub> and the formation of TiO<sub>2</sub> hollow particles with different shapes. The Cu and C peaks are attributed to the carbon-coated Cu grid used in TEM.

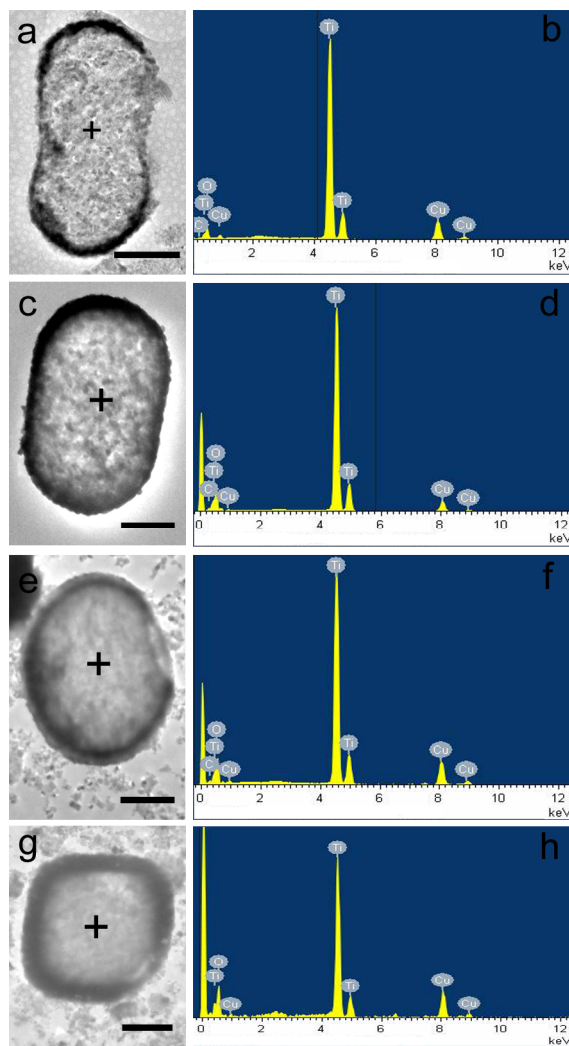

**Fig. S4** TEM images and EDX point spectra of TiO<sub>2</sub> hollow particles with different shapes: (a-b) peanuts; (c-d) capsules; (e-f) ellipsoids; and (g-h) pseudocubes. The Cu and C peaks are attributed to the carbon-coated Cu grid used in TEM. (b), (d), (f) and (h) are EDX point spectra taken from the center point of a TiO<sub>2</sub> hollow particle marked with a cross in the TEM images of (a), (c), (e) and (g), respectively. All of the scale bars are 500 nm.

## S5. Coulombic efficiencies of TiO<sub>2</sub> hollow particles with different shapes and solid microspheres

As shown in Fig. S5, the coulombic efficiencies of these TiO<sub>2</sub> hollow particles and solid microspheres are in the range of 70 to 80% in the first cycle, which increase to 93-97% in the second cycle and maintain in the range of 98 to 100% for the rest cycles.

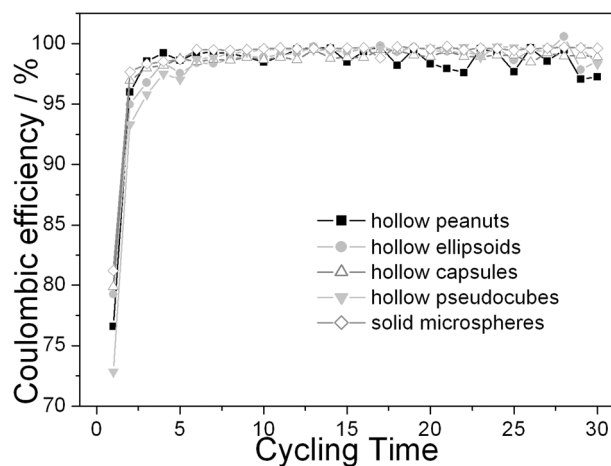

**Fig. S5** Coulombic efficiency of TiO<sub>2</sub> hollow particles with different shapes and solid microspheres.
